# Supplementary material for: Facile preparation of a polypyrrole modified Chinese yam peel-based adsorbent: characterization, performance, and application in removal of Congo red dye
Source: Royal Society of Chemistry journal article supplement (doi:10.1039/d1ra08280a), 2022-01-01
Supplement: d1ra08280a1.pdf [file d1ra08280a1.pdf]

## Supplementary Information for:

# Facile preparation of polypyrrole modified Chinese yam peel-based adsorbent: Characterization, performance, and application in removal of Congo red dye

Yan Wang\*, Rongyao Chen, Zijing Dai, Qingcai Yu, Yongmei Miao, Ronghua Xu

*College of Life and Health Sciences, Anhui Science and Technology University,  
Fengyang 233100, China*

## Text S1 Kinetic models

The adsorption kinetic model and their linearization equations were represented as follows:

$$\text{Pseudo-first-order kinetic model: } \log(q_e - q_t) = \log q_e - \frac{k_1}{2.303} t \quad (1)$$

$$\text{Pseudo-second-order kinetic model: } \frac{t}{q_t} = \frac{1}{k_2 q_e^2} + \frac{1}{q_e} t \quad (2)$$

$$\text{Elovich equation: } q_t = \frac{1}{b} \ln(ab) + \frac{1}{b} \ln t \quad (3)$$

$$\text{Intra-particle diffusion equation: } q_t = k_p t^{1/2} + c \quad (4)$$

where  $q_e$  ( $\text{mg}\cdot\text{g}^{-1}$ ) and  $q_t$  ( $\text{mg}\cdot\text{g}^{-1}$ ) are the amount of CR adsorbed on CYP-PPy at equilibrium and at a given time  $t$  (min), respectively.  $k_1$  ( $\text{min}^{-1}$ ) and  $k_2$  ( $\text{g}\cdot\text{mg}^{-1}\cdot\text{min}^{-1}$ ) are the rate constant of pseudo-first-order and pseudo-second-order kinetic equations. The parameter  $a$  ( $\text{mg}\cdot\text{g}^{-1}\cdot\text{min}^{-1}$ ) is the initial adsorption rate constant and  $b$  ( $\text{g}\cdot\text{mg}^{-1}$ ) is related to the extent of surface coverage and activation energy for chemisorptions.  $k_p$  ( $\text{mg}\cdot\text{g}^{-1}\cdot\text{min}^{-0.5}$ ) is the diffusion equation, and  $c$  ( $\text{mg}\cdot\text{g}^{-1}$ ) is a constant related to the thickness of the boundary layer.

## Text S2 Isotherm models

The corresponding isotherm equations are given in Eqs. (5)-(8), respectively.

$$\text{Freundlich isotherm model: } \ln q_e = \ln K_f + \frac{1}{n} \ln C_e \quad (5)$$

$$\text{Langmuir isotherm model: } \frac{C_e}{q_e} = \frac{1}{K_l q_m} + \frac{C_e}{q_m} \quad (6)$$

$$\text{D-R isotherm model: } \ln q_e = \ln q_m - K_D \left[ \text{RT} \ln \left( 1 + \frac{1}{C_e} \right) \right]^2 \quad (7)$$

$$\text{Temkin isotherm model: } q_e = \frac{\text{RT}}{b_T} \ln A_T + \frac{\text{RT}}{b_T} \ln C_e \quad (8)$$

where  $q_e$  ( $\text{mg}\cdot\text{g}^{-1}$ ) represents the adsorption capacity at equilibrium,  $C_e$  ( $\text{mg}\cdot\text{L}^{-1}$ ) is the equilibrium concentration of Mb in solution,  $K_f$  and  $n$  are the Freundlich constants related to the adsorption capacity and adsorption intensity of the adsorbent,

respectively. The value of Freundlich constant  $1/n$  indicates the type of sorption process to be unfavorable ( $1/n > 1$ ), favorable ( $0 < 1/n < 1$ ), and irreversible ( $1/n = 0$ ).  $q_m$  ( $\text{mg}\cdot\text{g}^{-1}$ ) is the maximum amount of Mb adsorbed per unit mass of adsorbent required for monolayer coverage of the surface,  $K_l$  ( $\text{L}\cdot\text{mg}^{-1}$ ) is Langmuir constant related to the adsorption energy. The  $K_D$  ( $\text{mol}^2\cdot\text{J}^{-2}$ ) parameter is activity coefficient depending on the mean free energy of adsorption.  $R$  ( $8.314 \text{ J}\cdot\text{mol}^{-1}\cdot\text{K}^{-1}$ ) is the gas constant and  $T$  (K) is the absolute temperature.  $A_T$  ( $\text{mL}\cdot\text{mg}^{-1}$ ) and  $b_T$  ( $\text{J}\cdot\text{mol}^{-1}$ ) are the isotherm constant and Temkin-Pyzhev constant, respectively.

The adsorption condition can be interpreted by separation factor  $R_L$ , which is defined by the following Eq.(9)

$$R_L = \frac{1}{1 + K_l C_0} \quad (9)$$

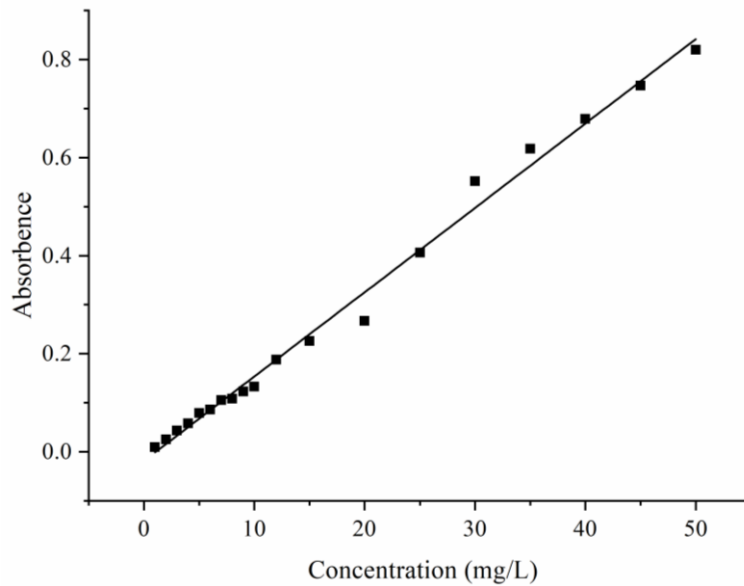

**Fig. S1.** Standard curve of Congo red

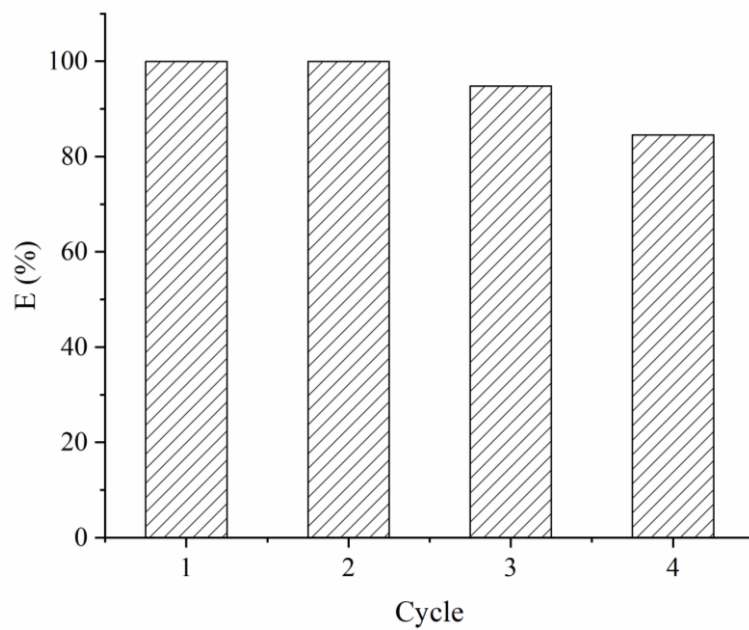

**Fig. S2.** Comparison of adsorption of CR onto CYP-PPy composite after the regeneration process.
